# Supplementary material
Source: publisher figshare collection journal article supplement (https://acs.figshare.com/ndownloader/files/7791784)
Supplement: Supplementary file 1 [file 7791784]

# **Induction of Chiral Recognition with Lipid Nano-Domains Produced by Polymerization**

*Yukihiro Okamoto, Yusuke Kishi, Keishi Suga, and Hiroshi Umakoshi\**

*Division of Chemical Engineering,  
Graduate School of Engineering Science, Osaka University,  
1-3 Machikaneyama-cho, Toyonaka, Osaka 560-8531*

\* Corresponding author: Hiroshi Umakoshi  
TEL: +81-(0)6-6850-6287, FAX: +81-(0)6-6850-6286.  
E-mail: b-ice@cheng.es.osaka-u.ac.jp

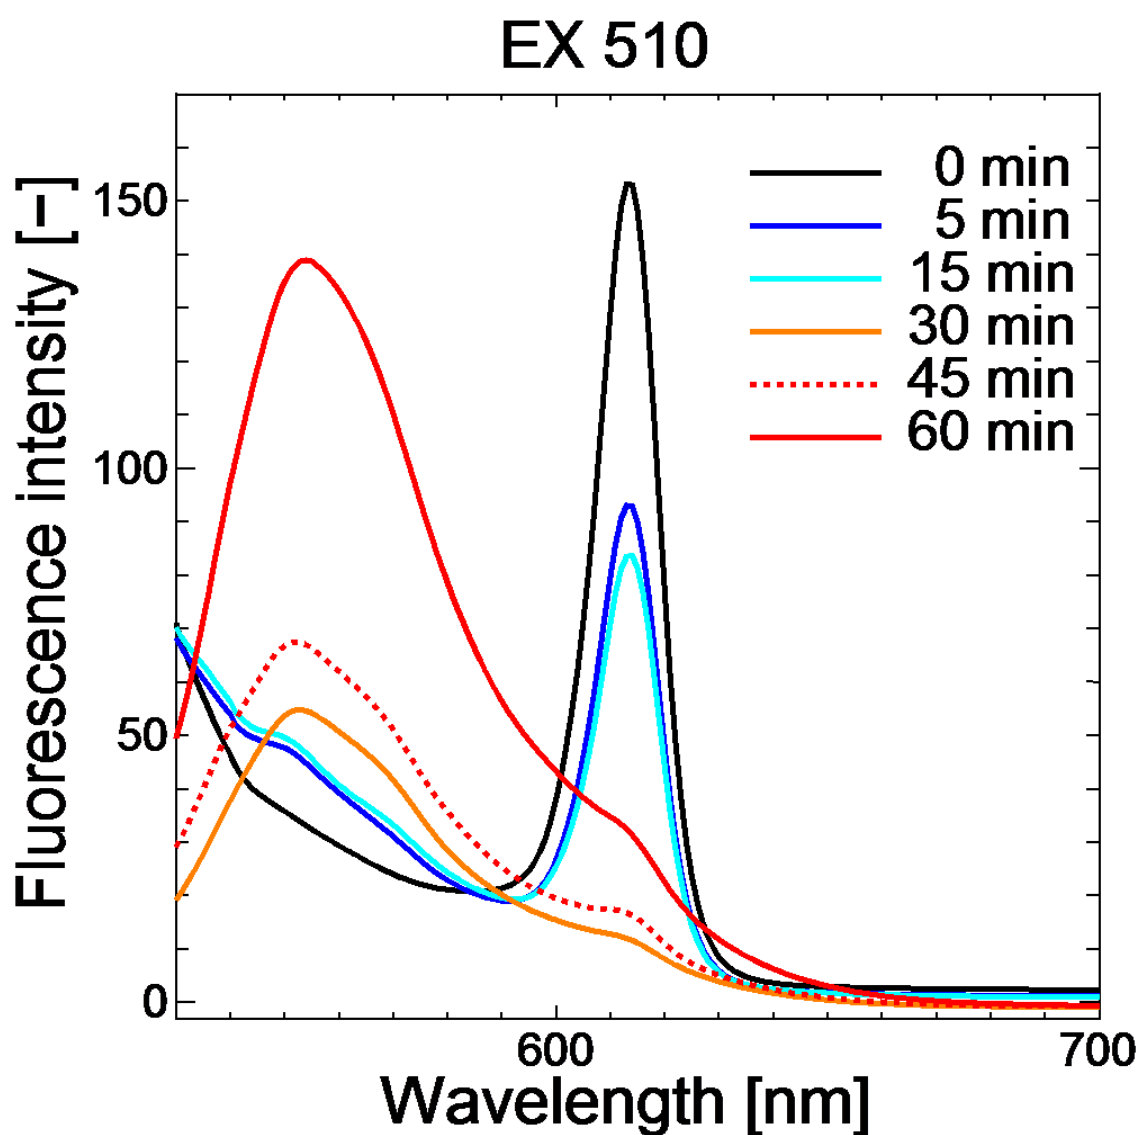

**Supplementary Figure S1.** Fluorescence spectra of DiynePC/DOPC (10/0) liposomes in different polymerization time. Experimental conditions: lipid concentration, 10 mM; diameter, 100 nm; background solution, 50 mM PB (pH = 6.7); temperature, 25°C; others, see experimental section.

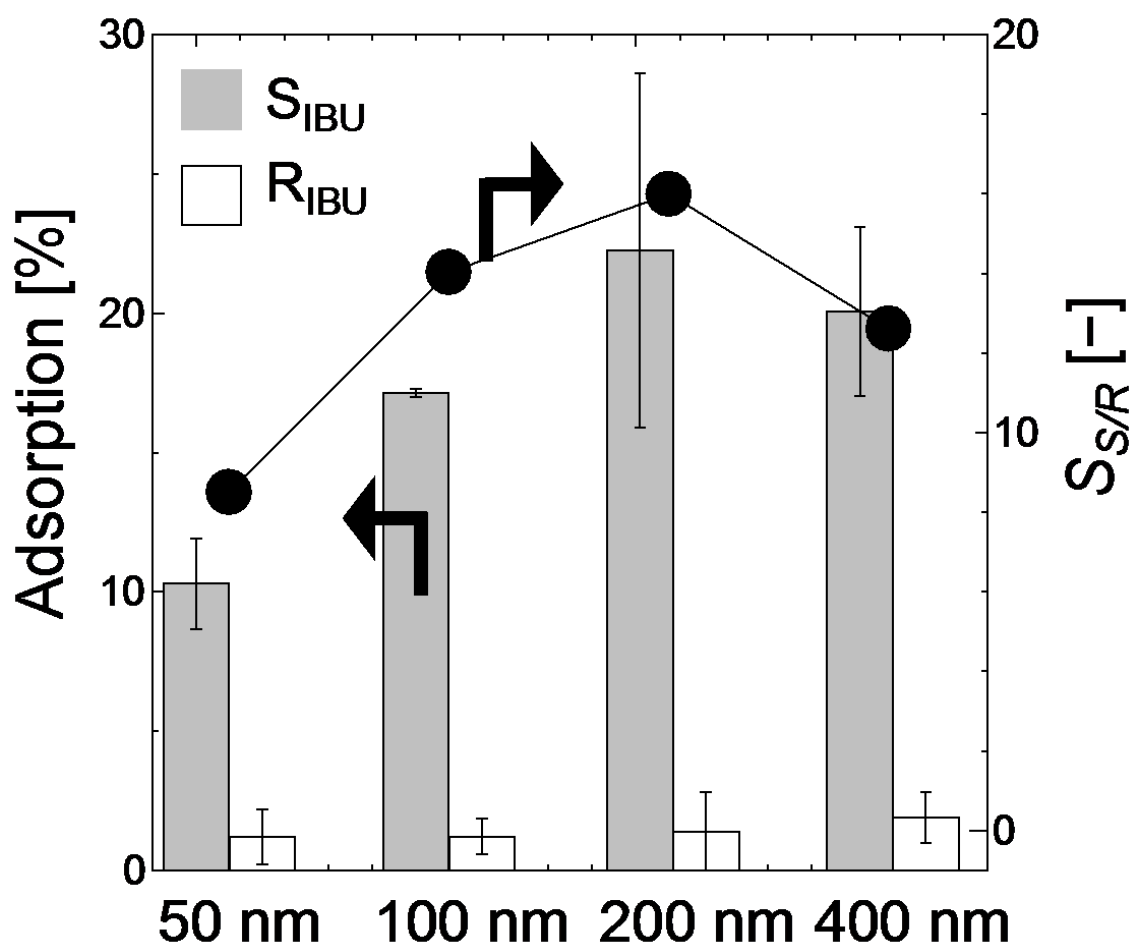

**Supplementary Figure S2.** Effect of diameter of poly DiynePC/DOPC(8/2) liposomes on the adsorbed amount and selectivity of S/R ibuprofen.

Experimental conditions: lipid concentration, 10 mM; polymerization time, 60 min; incubation temperature, 25°C; incubation time, 24 h; background solution, 50 mM PB (pH = 6.7); others, see experimental section. Error bars represent standard deviations ( $n = 3$ ).

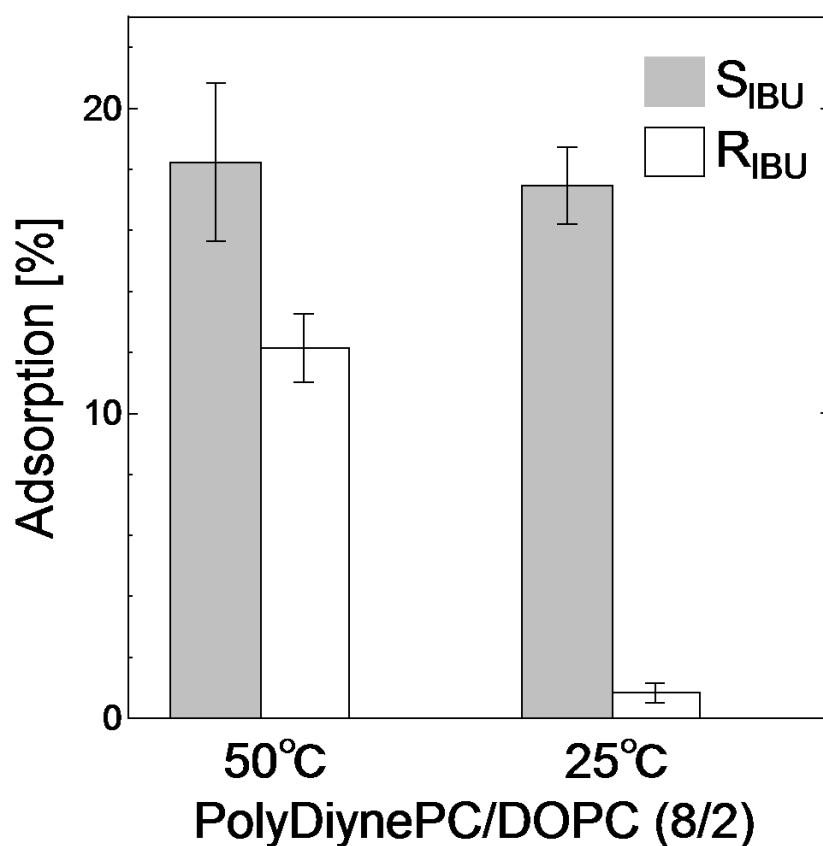

**Supplementary Figure S3.** Effect of incubation temperature on the adsorbed amount and selectivity of S/R ibuprofen by poly DiynePC/DOPC(8/2) liposomes.

Experimental conditions: lipid concentration, 10 mM; polymerization time, 60 min; diameter, 100 nm; incubation time, 24 h; background solution, 50 mM PB (pH = 6.7); others, see experimental section. Error bars represent standard deviations ( $n = 3$ ).

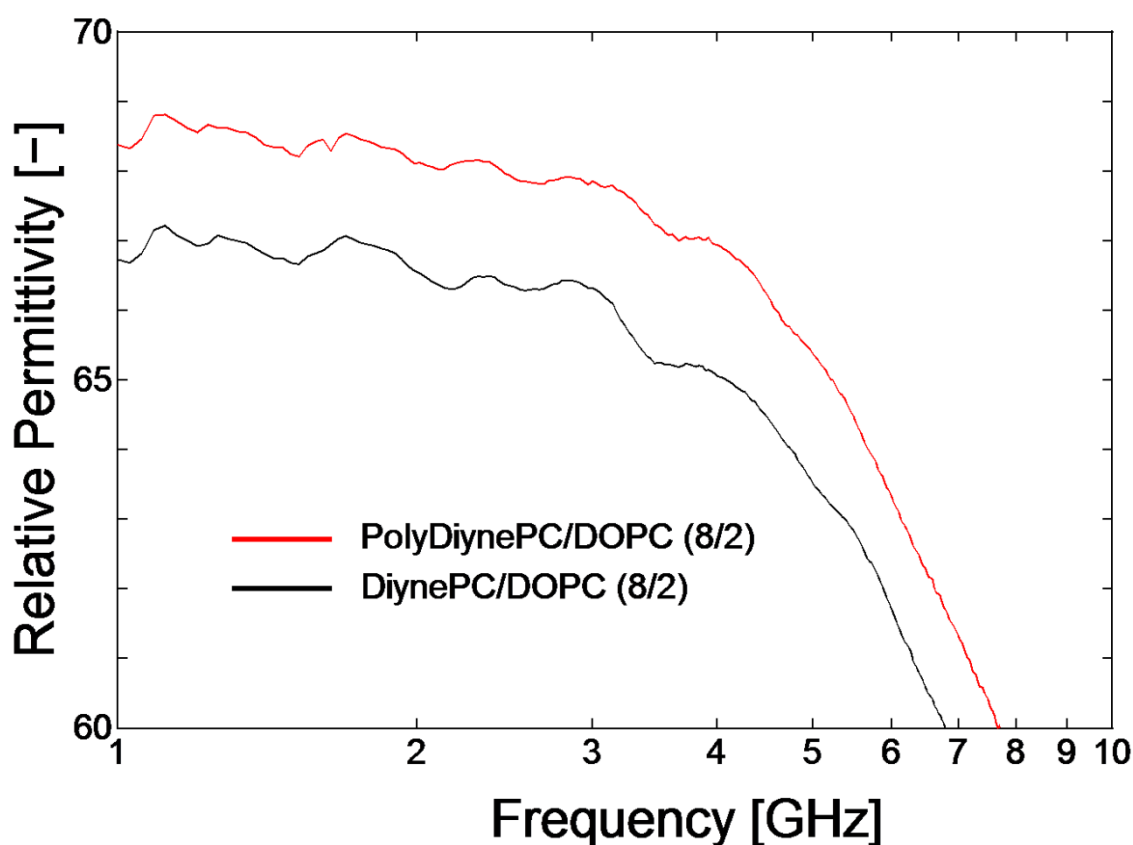

**Supplementary Figure S4.** Hydration state of DiynePC/DOPC(8/2) liposomes before and after polymerization by dielectric dispersion analyses.

Experimental conditions: lipid concentration, 10 mM; polymerization time, 60 min; diameter, 100 nm; temperature, 25°C; background solution, 50 mM PB (pH = 6.7); others, see experimental section.
